# Supplementary material for: Low temperature benzene oxidation over copper–silver catalyst: roles of copper oxide and silver on cerium–zirconium mixed oxide
Source: Royal Society of Chemistry journal article supplement (doi:10.1039/d0cy00691b), 2020-01-01
Supplement: d0cy00691b1.pdf [file d0cy00691b1.pdf]

Electronic supplementary information

**Low temperature benzene oxidation over copper-silver catalyst: roles of  
copper oxide and silver on cerium-zirconium mixed oxide†**

Jin Hee Lee,<sup>a</sup> Hyeyeon Jang,<sup>ab</sup> Jeong-Hun Kim,<sup>a</sup> Ji Hoon Park,<sup>a</sup> Kwan-Young Lee,<sup>b</sup> Min Bum Park,<sup>c</sup> Sung Bong Kang,<sup>d</sup> Tae-Sun Chang<sup>\*a</sup> and Iljeong Heo<sup>\*a</sup>

<sup>a</sup>Center for Environment & Sustainable Resources, Korea Research Institute of Chemical Technology, Daejeon 34114, Korea

<sup>b</sup>Department of Chemical and Biological Engineering, Korea University, Seoul 02841, Korea

<sup>c</sup>Department of Energy and Chemical Engineering, Incheon National University, Incheon 22012, Korea

<sup>d</sup>School of Earth Sciences and Environmental Engineering, Gwangju Institute of Science and Technology, Gwangju 61005, Korea

\*Corresponding authors: tschang@kRICT.re.kr (T.-S.C.), zaiseok@kRICT.re.kr (I.H.)

**Table S1** Elemental composition of CZCuAg (CZ:Cu:Ag = 1:0.5:0.5) measured by ICP-AES

| Element        | Cu   | Ag   | Si     | Na                |
|----------------|------|------|--------|-------------------|
| Content (wt.%) | 13.6 | 19.3 | 0.0062 | n.d. <sup>a</sup> |

<sup>a</sup> Detection limit of Na < 0.00030 wt.% (3.0 ppm)

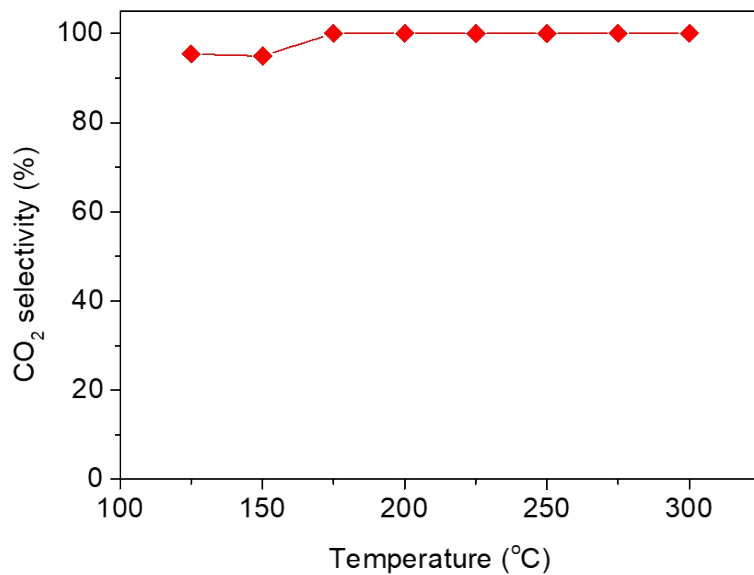

**Fig. S1** CO<sub>2</sub> selectivity as a function of temperature over the CZCuAg (CZ:Cu:Ag = 1:0.5:0.5) catalyst. Feed gas composition: 150 ppm C<sub>6</sub>H<sub>6</sub>, 2.5 vol.% H<sub>2</sub>O, air balance. GHSV = 100,000 h<sup>-1</sup>.

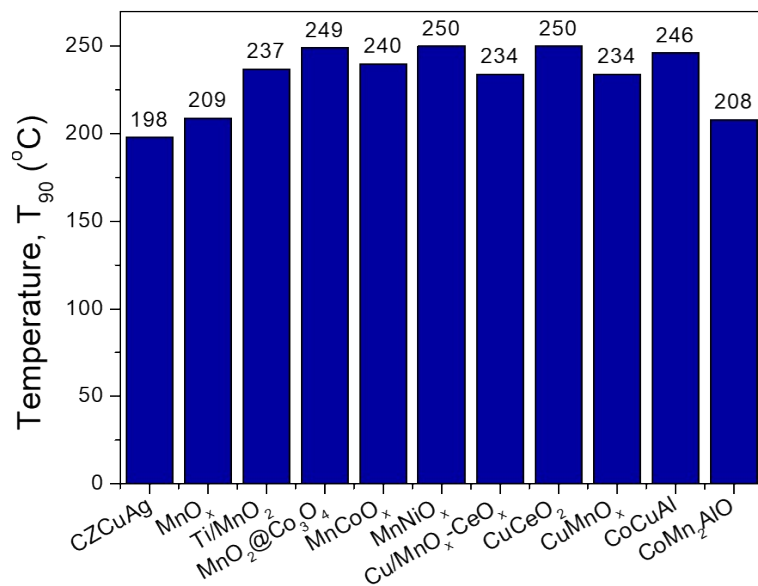

**Fig. S2** Comparison of the catalytic activities of CZCuAg and some reported catalysts for benzene oxidation.<sup>1</sup>

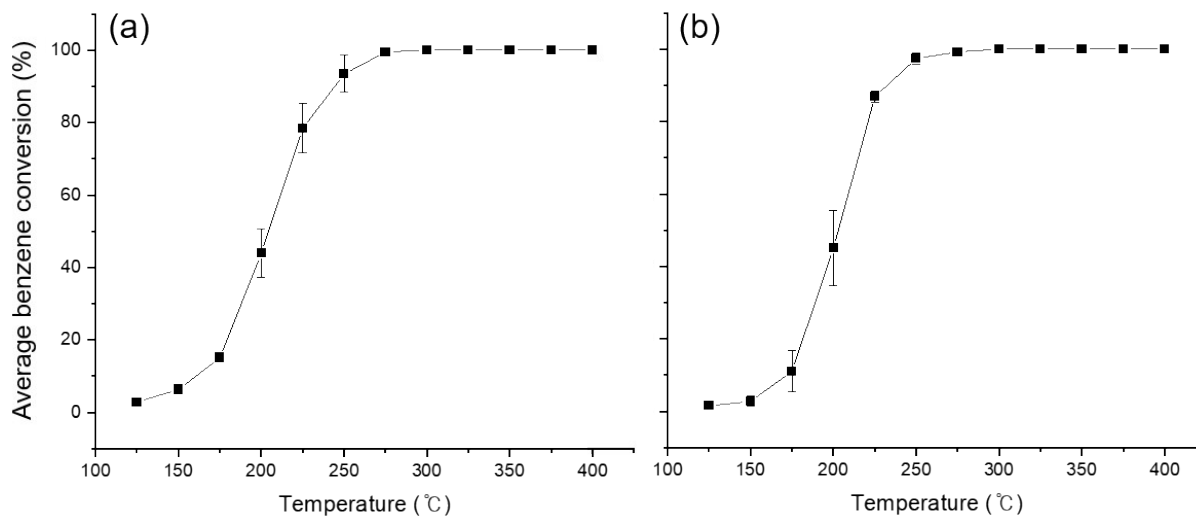

**Fig. S3** Average benzene conversion as a function of reaction temperature obtained from three repeated reproducibility tests for benzene oxidation over (a) CZCuAg (CZ:Cu:Ag = 1:0.5:0.5) and (b) PtPd/γ-Al<sub>2</sub>O<sub>3</sub> catalysts. Feed gas composition: 150 ppm C<sub>6</sub>H<sub>6</sub>, 2.5 vol.% H<sub>2</sub>O, air balance. GHSV = 100,000 h<sup>-1</sup>.

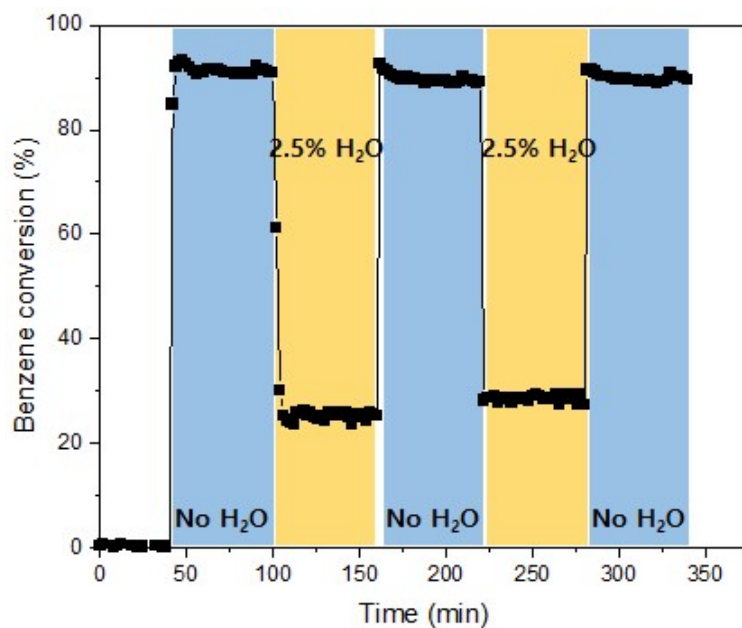

**Fig. S4** Benzene oxidation catalyzed by CZCuAg (CZ:Cu:Ag = 1:0.5:0.5) under water on/off cycle. 150 ppm/air balance C<sub>6</sub>H<sub>6</sub> was fed into the catalyst bed at 250 °C with GHSV = 100,000 h<sup>-1</sup> under 2.5 vol.% H<sub>2</sub>O on/off cycle.

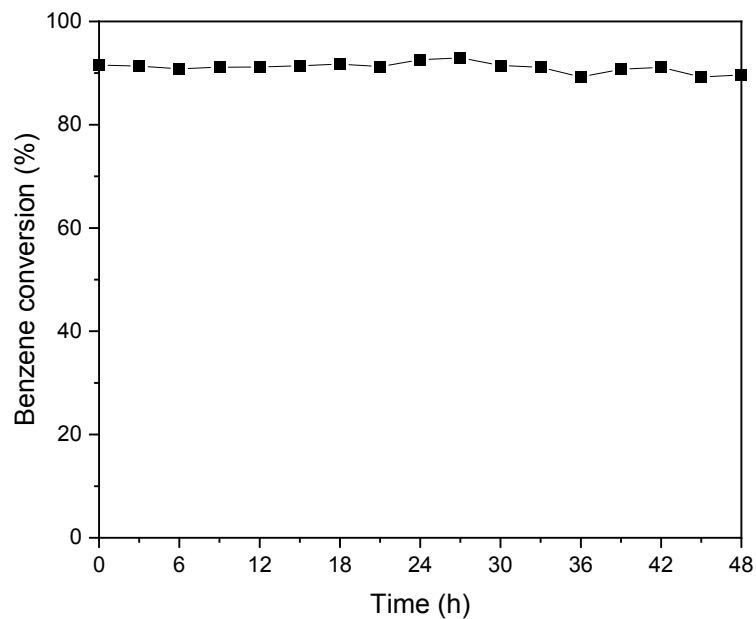

**Fig. S5** Benzene oxidation catalyzed by CZCuAg (CZ:Cu:Ag = 1:0.5:0.5) at 250 °C in the presence of water. Feed gas composition: 150 ppm C<sub>6</sub>H<sub>6</sub>, 2.5 vol.% H<sub>2</sub>O, air balance. GHSV = 100,000 h<sup>-1</sup>.

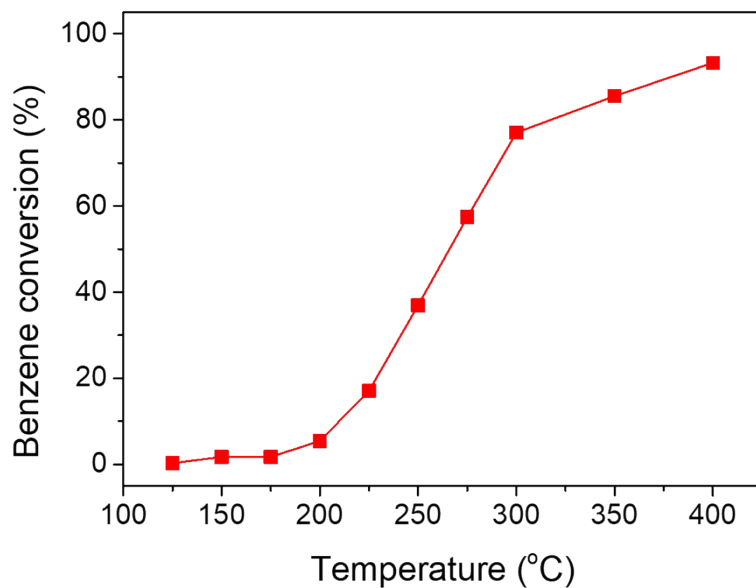

**Fig. S6** Light-off curve for benzene oxidation obtained from the CZCuAg (CZ:Cu:Ag = 1:0.5:0.5) catalyst thermally aged at 800 °C for 5 h in air. Feed gas composition: 150 ppm C<sub>6</sub>H<sub>6</sub>, 5.0 vol.% H<sub>2</sub>O, air balance. GHSV = 100,000 h<sup>-1</sup>.



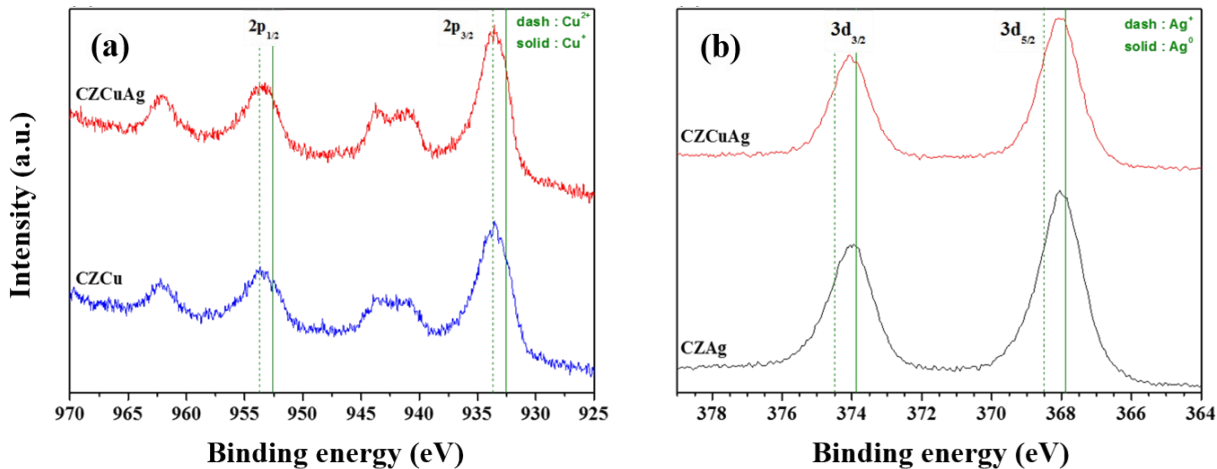

**Fig. S7** (a) Cu 2p XPS spectra of CZCu (CZ:Cu = 1:1) and CZCuAg (CZ:Cu:Ag = 1:0.5:0.5) and (b) Ag 3d spectra of CZAg (CZ:Ag = 1:1) and CZCuAg (CZ:Cu:Ag = 1:0.5:0.5).

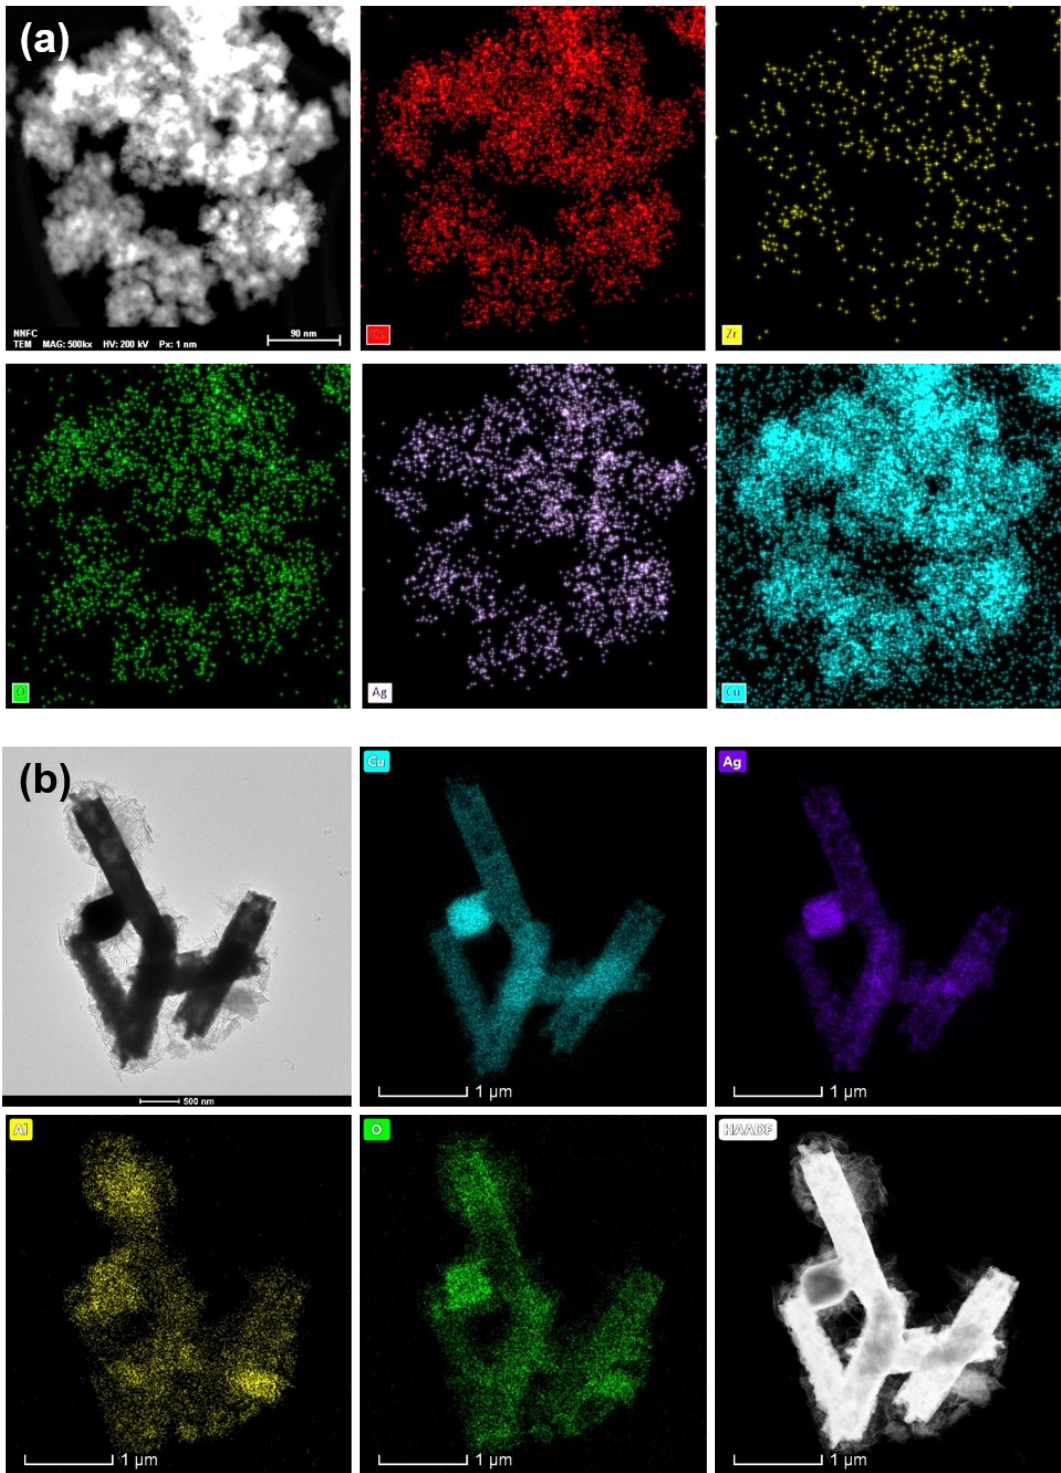

**Fig. S8** STEM image and cerium, zirconium, oxygen, silver, copper, and/or aluminum EDX elemental mapping of (a) CZCuAg (CZ:Cu:Ag = 1:0.5:0.5) and (b) CuAg/ $\gamma$ -Al<sub>2</sub>O<sub>3</sub>.

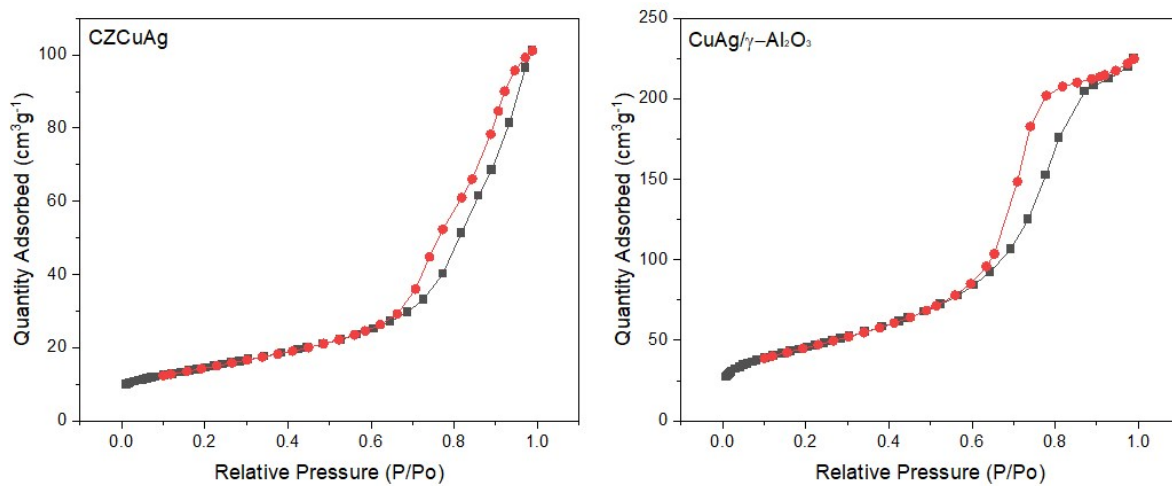

**Fig. S9** N<sub>2</sub>-physorption isotherms for CZCuAg (CZ:Cu:Ag = 1:0.5:0.5) and CuAg/γ-Al<sub>2</sub>O<sub>3</sub>.

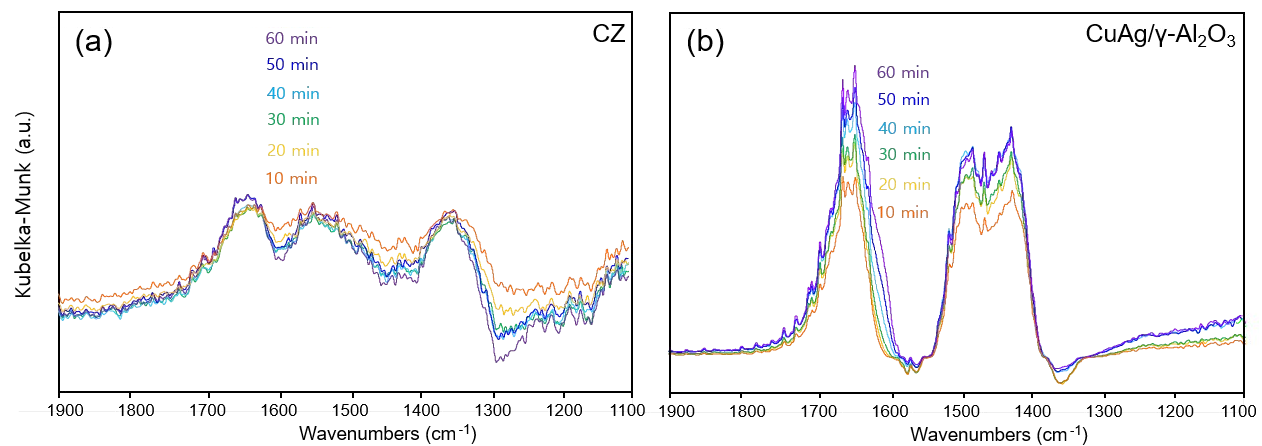

**Fig. S10** DRIFT spectra during the benzene oxidation at RT over (a) support CZ and (b) CuAg/ $\gamma$ -Al<sub>2</sub>O<sub>3</sub>. Each sample was pretreated with 10% O<sub>2</sub>/N<sub>2</sub> at 400 °C for 1 h and 150 ppm of benzene/N<sub>2</sub> was introduced at RT. The spectra were collected every 10 min.

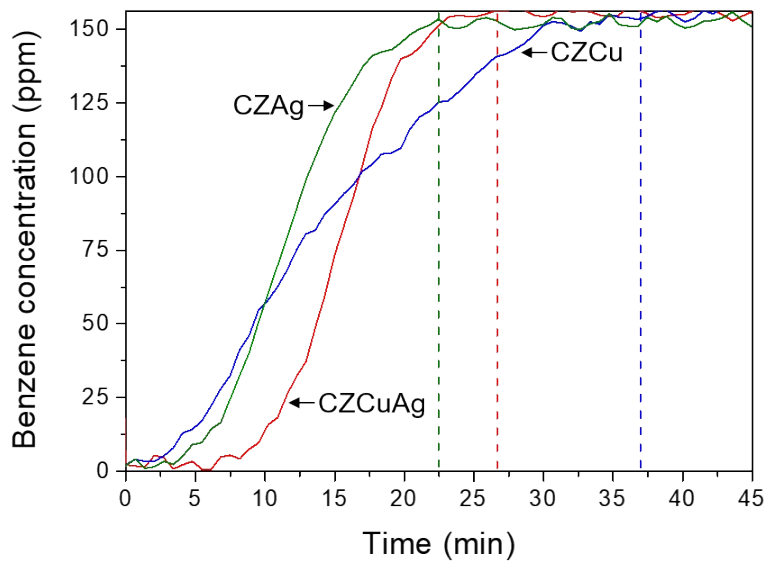

**Fig. S11** Benzene adsorption curves at RT for CZCu, CZAg and CZCuAg catalysts. 150 ppm of benzene/air was introduced with GHSV of 100,000 h<sup>-1</sup>.
